# Supplementary material
Source: MDPI journal article supplement (https://www.mdpi.com/1099-4300/15/3/1118)
Supplement: s1 [file s1]

Page 1124, 3 lines after Equation (3a): The units of  $N_D$  are in billions of particles,  $10^9$ , instead of  $10^{10}$ .
